# Supplementary material for: Hsp27 binding to the 3′UTR of bim mRNA prevents neuronal death during oxidative stress–induced injury: a novel cytoprotective mechanism
Source: PubMed Central journal article supplement — Mol Biol Cell. 2014 Nov 1;25(21):3413–23. doi: 10.1091/mbc.E13-08-0495 (PMC4214787; doi:10.1091/mbc.e13-08-0495), 2014-11-01
Supplement: supp_E13-08-0495_CombinedSupMats.pdf [file supp_E13-08-0495_CombinedSupMats.pdf]

# Supplemental Materials

*Molecular Biology of the Cell*

Dávila et al.

**SUPPLEMENTARY FIGURE 1.** (A) CGNs were transfected with pNEO-Hsp27 or a control construct prior to H<sub>2</sub>O<sub>2</sub> (25, 37.5 and 50μM) addition. pNEO-Hsp27 neurons did not display up-regulation of the active, cleaved caspase-3 (Asp175) compared to control neurons 4h after H<sub>2</sub>O<sub>2</sub> treatment. Neuronal marker Neu-N and β-actin served as loading controls, β-actin levels were not modified by H<sub>2</sub>O<sub>2</sub> treatment. (B) CGNs from *puma* <sup>-/-</sup> mice, and wild-type (WT) controls were treated with H<sub>2</sub>O<sub>2</sub> (37.5 μM) or sham conditions. 4-6 h post treatment the neurons were stained live with Hoechst and pyknotic nuclei were scored. After H<sub>2</sub>O<sub>2</sub> treatment, wild type and *puma*-deficient neurons showed a significant increase in the percentage of cells with nuclear pyknosis (\*p< 0.05; n = 3) Bar, 2.5 μm.

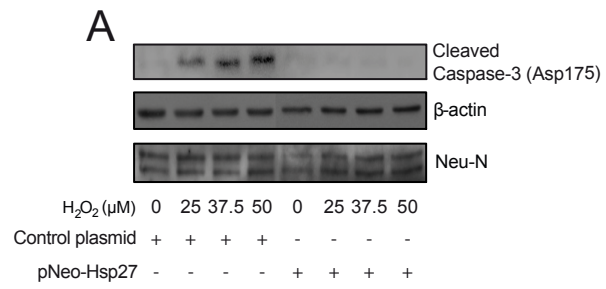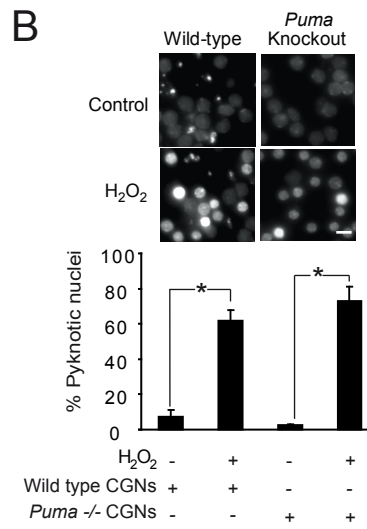

Supplementary figure 1
